# Supplementary material for: Excited state dependent electron transfer of a rhenium-dipyridophenazine complex intercalated between the base pairs of DNA: a time-resolved UV-visible and IR absorption investigation into the photophysics of fac-[Re(CO)3(F2dppz)(py)]+ bound to either [poly(dA-dT)]2 or [poly(dG-dC)]2
Source: Royal Society of Chemistry journal article supplement (doi:10.1039/c1pp05050h), 2011-06-23
Supplement: c1pp05050h.pdf [file c1pp05050h.pdf]

## Electronic Supporting Information (ESI)

### Excited State Dependent Electron Transfer of Re-dppz Intercalator in DNA: A Time-resolved UV-Visible and IR Absorption Investigation into the Photophysics of *fac*-[Re(CO)<sub>3</sub>(dppz-F<sub>2</sub>)(py)]<sup>+</sup> Bound to Either [poly(dA-dT)]<sub>2</sub> or [poly(dG-dC)]<sub>2</sub>

Qian Cao, Caitriona M. Creely, E. Stephen Davies, Joanne Dyer, Timothy Easun, David C. Grills, Sarah Hudson, David A. McGovern, Jonathan McMaster, Jonathan Pitchford, Jayden A. Smith, Xue-Zhong Sun, John M. Kelly and Michael W. George

#### Estimation of Binding Constants

The intrinsic binding constants,  $K_b$ , for the complex bound to [poly(dGdC)]<sub>2</sub> and [poly(dAdT)]<sub>2</sub> were determined by adding aliquots of the polynucleotide to a buffered solution (50 mM phosphate, pH 7) of known concentration of rhenium and employing using the method described by Yam et al.<sup>1</sup> using the following equation:

$$D/\Delta\epsilon_{ap} = (D/\Delta\epsilon) + (\Delta\epsilon K_b)^{-1}$$

where:

- D is the concentration of the polynucleotide in base pairs, determined spectrophotometrically using molar (phosphate) absorption coefficients of  $\epsilon_{254} = 8400 \text{ dm}^3 \text{ mol}^{-1} \text{ cm}^{-1}$  for [poly(dGdC)]<sub>2</sub> and  $\epsilon_{262} = 6600 \text{ dm}^3 \text{ mol}^{-1} \text{ cm}^{-1}$  for [poly(dAdT)]<sub>2</sub><sup>3</sup>
- $\Delta\epsilon_{ap} = (\epsilon_a - \epsilon_f)$ , where  $\epsilon_a$  is the apparent molar absorption coefficient, obtained from  $A_{\text{observed}}/[\text{Re}]$ , and  $\epsilon_f$  is the molar absorption coefficient of the free complex
- $\Delta\epsilon = (\epsilon_b - \epsilon_f)$ , where  $\epsilon_b$  is the molar absorption coefficient of the fully-bound complex

A linear fit of a plot of  $D/\Delta\epsilon_{ap}$  vs D therefore yields a slope,  $1/\Delta\epsilon$  and y intercept,  $(\Delta\epsilon K_b)^{-1}$  respectively, the ratio of which gives the intrinsic binding constant,  $K_b$ .

1. Yam, V. W. W., Lo, K. K. W., Cheung, K. K., and Kong, R. Y. C., *J. Chem. Soc., Dalton Trans.*, **1997**, 2067.
2. Wells, R. D. et al., *J. Mol. Biol.*, **1970**, 54, 465.
3. Inman, R. B. et al., *J. Mol. Biol.*, **1962**, 5, 172.

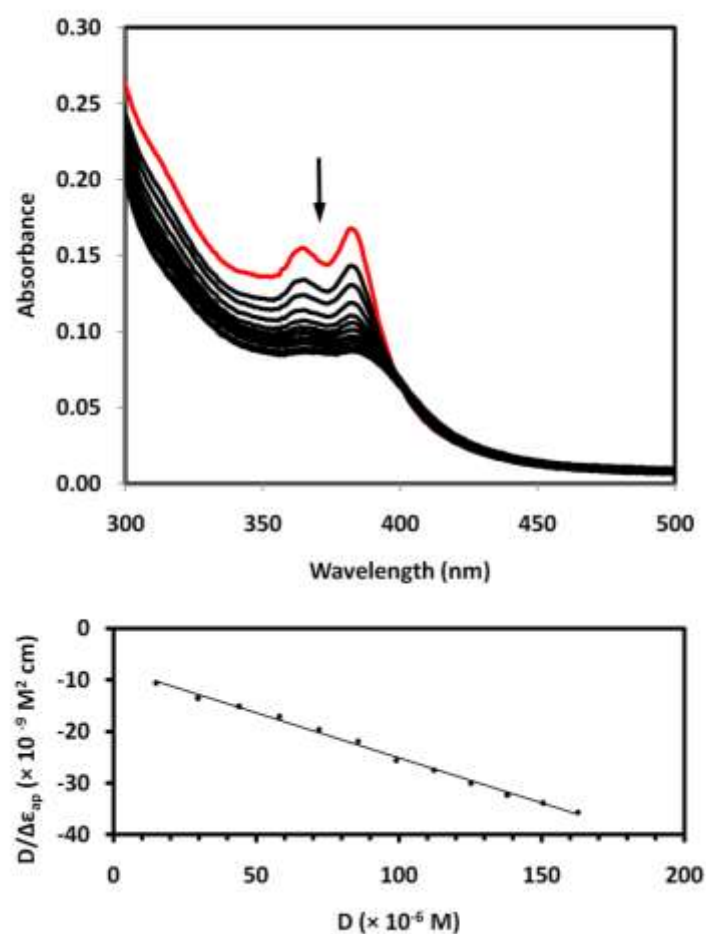

**Figure S1.** UV/vis absorption spectra of *fac*-[Re(CO)<sub>3</sub>(dppz-F<sub>2</sub>)(py)]<sup>+</sup> recorded at room temperature in buffered D<sub>2</sub>O solution (red trace, 1.51 × 10<sup>-5</sup>M) and in the presence of increasing concentrations (black traces) of [poly(dA-dT)]<sub>2</sub>, up to [nucleotide]:[Re] ≈ 12:1. Also shown is the plot of  $D/\Delta\epsilon_{ap}$  vs.  $D$  for this experiment.

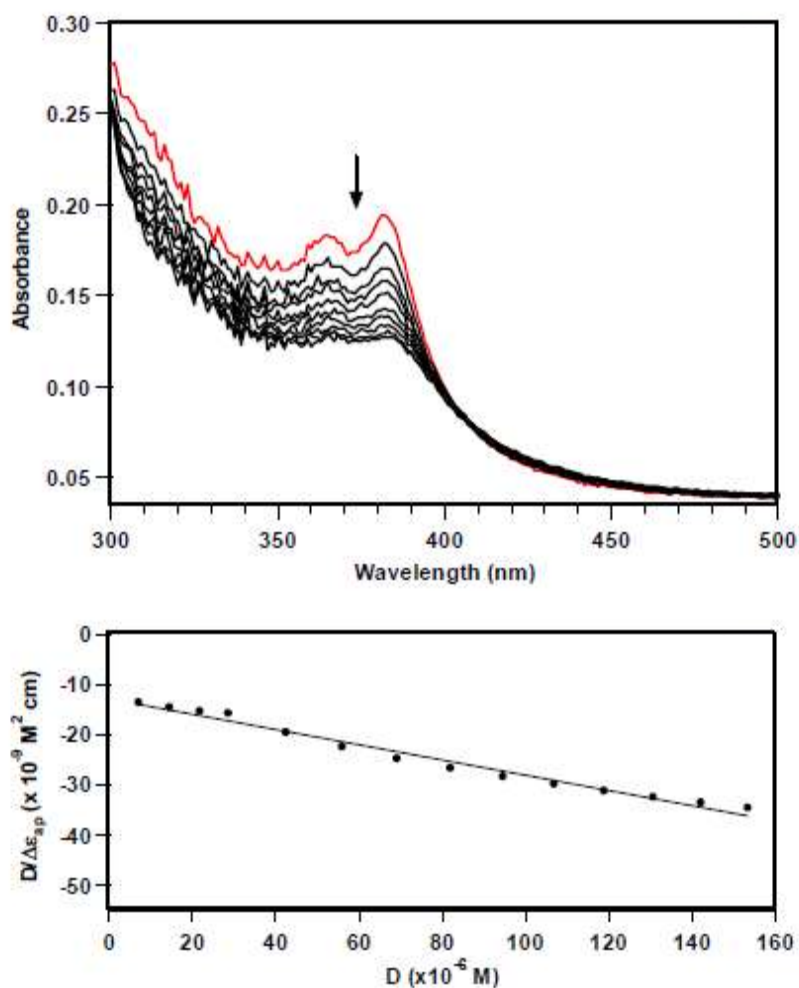

**Figure S2.** UV/vis absorption spectra of  $fac\text{-[Re(CO)}_3(\text{dppz-F}_2)(\text{py})]^+$  recorded at room temperature in buffered  $\text{D}_2\text{O}$  solution (red trace,  $1.44 \times 10^{-5}\text{M}$ ) and in the presence of increasing concentrations (black traces) of  $[\text{poly(dG-dC)}]_2$ , up to  $[\text{nucleotide}]:[\text{Re}] \approx 12:1$ . Also shown is the plot of  $D/\Delta\epsilon_{ap}$  vs.  $D$  for this experiment.

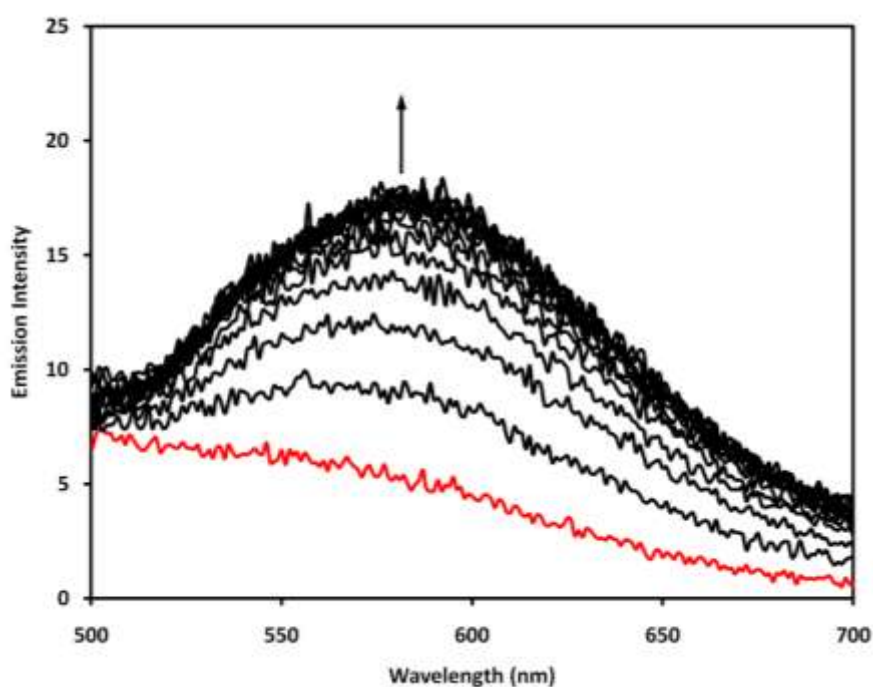

**Figure S3.** Steady state emission spectra of *fac*-[Re(CO)<sub>3</sub>(dppz-F<sub>2</sub>)(py)]<sup>+</sup> ( $\lambda_{\text{ex}} = 365$  nm) recorded at room temperature in buffered D<sub>2</sub>O solution ( $1.51 \times 10^{-5}$  M, red trace) and in the presence of increasing concentrations (black traces) of [poly(dA-dT)]<sub>2</sub>, up to [nucleotide]:[Re]  $\approx$  12:1. Spectra are corrected for background (10 mM phosphate buffer in D<sub>2</sub>O).
